# Supplementary material for: The Role of TRPA1 Channels in the Central Processing of Odours Contributing to the Behavioural Responses of Mice
Source: MDPI journal article supplement (doi:10.3390/ph14121336), 2021-12-20
Supplement: s1 [file s1]

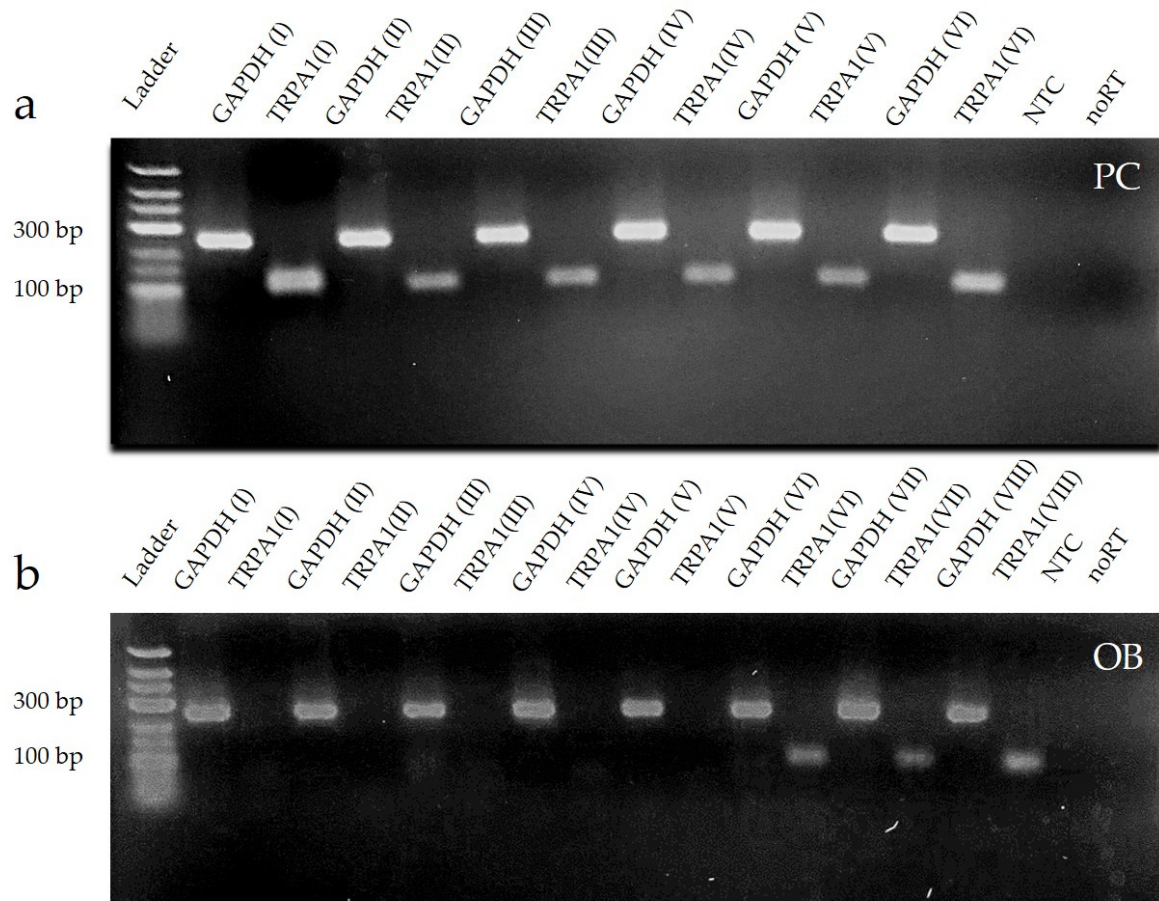

**Figure S1.** Electrophoretograms of RT-PCR products. Six olfactory bulb samples of C57BL/6 mice were investigated. The housekeeping gene (glyceraldehyde 3-phosphate dehydrogenase (*Gapdh*), size: 237 bp) and the gene of interest (*Trpa1*, size: 101 bp) were expressed in all samples (**a**). Eight piriform cortex samples of C57BL/6 mice were investigated. The housekeeping gene (*Gapdh*, size: 237 bp) was expressed in all samples but a detectable level of gene of interest (*Trpa1*, size: 101 bp) could be found only in three cases (**b**). NTC: no template control; noRT: no reverse transcriptase controls.

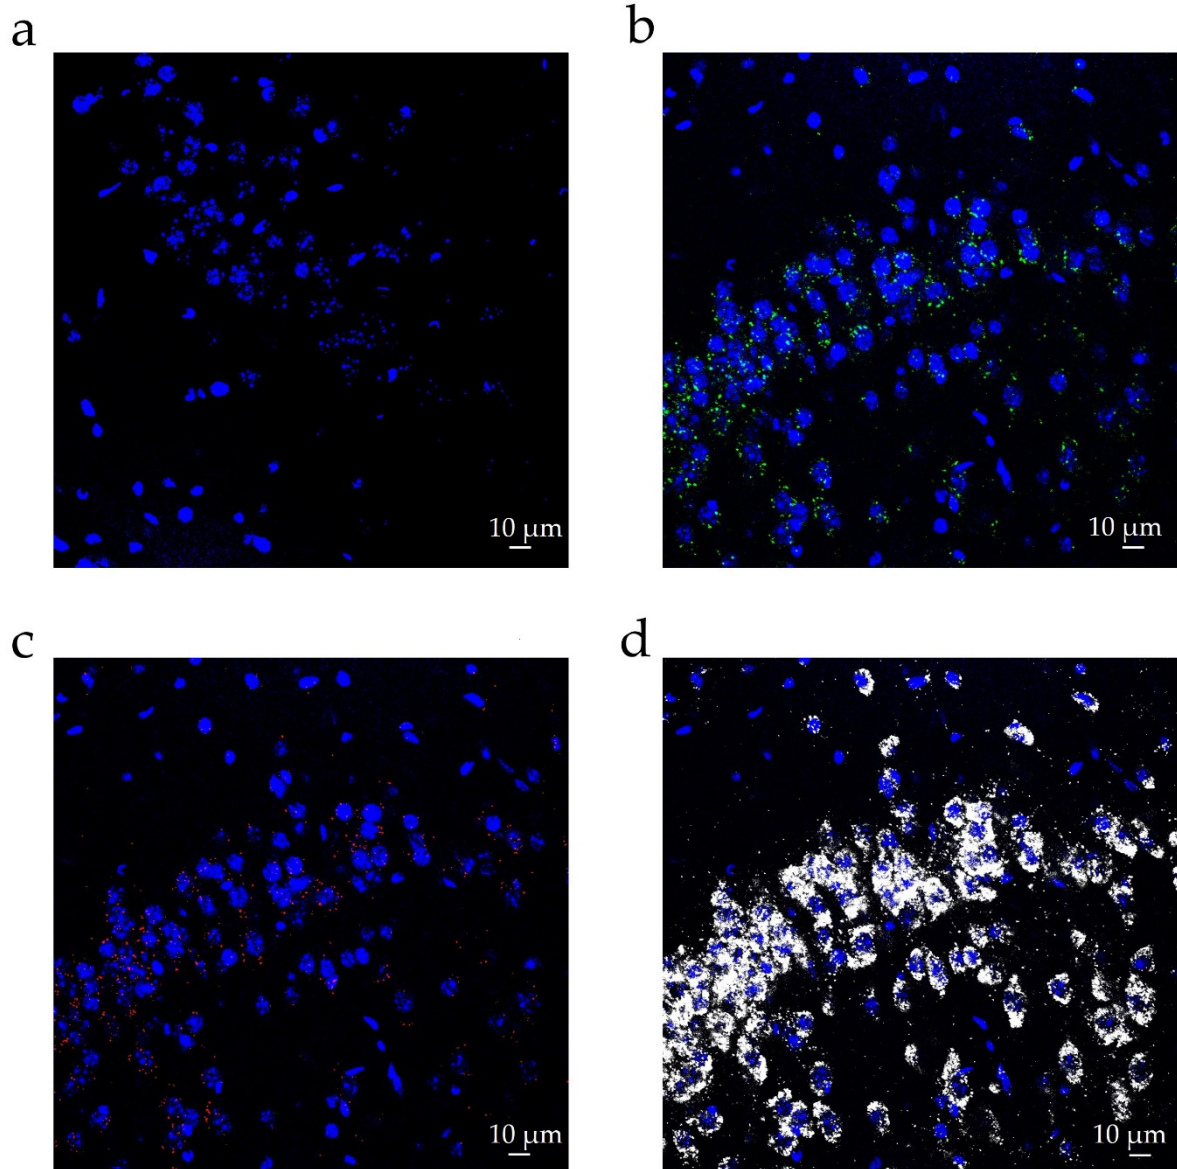

**Figure S2.** RNAscope triplex positive and negative controls in the mouse piriform cortex. RNAscope triplex negative control probes would hybridize with the bacterial *dabP* gene (a). RNAscope triplex positive control probes specific to mouse *Polr2a* (b), *Ppib* (c) and *Ubc* (d). mRNA targets are represented in green, red and white, respectively. Abbreviations: *dabP*: D-box binding PAR BZIP transcription factor, *Polr2a*: RNA polymerase II subunit A, *Ppib*: peptidylprolyl isomerase B, *Ubc*: ubiquitin C
